# Supplementary material for: High temperature reductive treatment promotes thermal stability of Pt/hexaaluminate catalysts for CO and C3H8 oxidation
Source: Royal Society of Chemistry journal article supplement (doi:10.1039/d4cy00708e), 2024-01-01
Supplement: d4cy00708e1.pdf [file d4cy00708e1.pdf]

## Supporting information

### High temperature reductive treatment promotes thermal stability of Pt/hexaaluminate catalysts for CO and C<sub>3</sub>H<sub>8</sub> oxidation

Yumeng Xu,<sup>a</sup> Rongzhou Chen,<sup>a</sup> Hailian Tang,<sup>b</sup> Lu Yan,<sup>a</sup> Fei Huang,<sup>\*a</sup> Ming Tian,<sup>c</sup> Kaibao Wu,<sup>a</sup>

Yanliang Zhou,<sup>d</sup> Jian Lin,<sup>\*c</sup> Ying Zheng,<sup>a</sup> and Xiaodong Wang<sup>\*c</sup>

<sup>a</sup> Fujian Provincial Key Laboratory of Advanced Materials Oriented Chemical Engineering, Fujian Provincial Key Laboratory of Polymer Materials, College of Chemistry and Materials Science, Fujian Normal University, Fuzhou 350007, Fujian, China.

<sup>b</sup> School of Chemistry and Chemical Engineering, Tianjin University of Technology, Tianjin 300384, China.

<sup>c</sup> CAS Key Laboratory of Science and Technology on Applied Catalysis, Dalian Institute of Chemical Physics, Chinese Academy of Sciences, Dalian 116023, Liaoning, China.

<sup>d</sup> National Engineering Research Center of Chemical Fertilizer Catalyst, Fuzhou University, Fuzhou 350002, Fujian, China.

\* Corresponding author. Fax: +86 0591 83464353.

E-mail: feihuang@fjnu.edu.cn (F. H); jianlin@dicp.ac.cn (J. L) ; xdwang@dicp.ac.cn (X.

W)

## 1. Experimental details

### 1.1 Preparation of hexaaluminate supports.

Hexaaluminates ( $\text{BaFe}_x\text{Al}_{12-x}\text{O}_{19}$ ,  $x = 0, 1$ ) were prepared via a  $(\text{NH}_4)_2\text{CO}_3$  coprecipitation method reported in our previous work.<sup>1</sup> Taking  $\text{BaFeAl}_{11}\text{O}_{19}$  as an example, calculated amounts of  $\text{Ba}(\text{NO}_3)_2$ ,  $\text{Fe}(\text{NO}_3)_3 \cdot 9\text{H}_2\text{O}$ , and  $\text{Al}(\text{NO}_3)_3 \cdot 9\text{H}_2\text{O}$  were dissolved individually in deionized water at  $60\text{ }^\circ\text{C}$  and then added to a saturated aqueous solution of  $(\text{NH}_4)_2\text{CO}_3$  under stirring for 3 h. The resulting precipitate was filtered, washed with deionized water, and then dried at  $110\text{ }^\circ\text{C}$  overnight. Finally, the sample was calcined in air at  $500\text{ }^\circ\text{C}$  for 5 h and then  $1300\text{ }^\circ\text{C}$  for 6 h. The obtained  $\text{BaAl}_{12}\text{O}_{19}$  and  $\text{BaFeAl}_{11}\text{O}_{19}$  supports were denoted as BA and BFA, respectively. The  $\text{BaFeAl}_{11}\text{O}_{19}$  precipitate precursor calcined at  $900\text{ }^\circ\text{C}$  for 5 h was denoted as BFA-P.

### 1.2 Preparation of platinum/hexaaluminate.

A facile adsorption method was employed to synthesize hexaaluminate-supported platinum catalyst. Taking the preparation of 1wt % Pt/BFA for example, 1g of BFA support was firstly dispersed in 100 mL of deionized water under ultrasonic treatment for 5 min. After that, the desired amount of  $\text{K}_2\text{PtCl}_4$  solution was gradually dropped into the above solution, followed that the suspension was continuously stirring at room temperature overnight. The resulting precipitate was filtered, washed with 1 L of distilled water, and then dried at  $80\text{ }^\circ\text{C}$  overnight.

### 1.3 Activity measurement.

The CO oxidation (or  $\text{C}_3\text{H}_8$  oxidation) was performed on a fixed-bed reactor and approximately 50 mg of catalyst was loaded into a U-type quartz tube for the reaction. The feed gases consisted of 1 vol% CO + 1 vol%  $\text{O}_2$  + 98 vol% Ar (or 0.2 vol%  $\text{C}_3\text{H}_8$  + 2 vol%  $\text{O}_2$  + 97.8 vol% Ar). The gas flow rate was  $16.67\text{ mL min}^{-1}$  (or  $33.33\text{ mL min}^{-1}$  for  $\text{C}_3\text{H}_8$  oxidation), leading to a space velocity of  $20\ 000\text{ mL h}^{-1}\text{ g}_{\text{cat}}^{-1}$  (or  $40\ 000$

mL h<sup>-1</sup> g<sub>cat</sub><sup>-1</sup> for C<sub>3</sub>H<sub>8</sub> oxidation). Before evaluation, the catalyst was pre-reduced at 400 °C for 1 h in a flow of 33.33 mL min<sup>-1</sup> under H<sub>2</sub> atmosphere. The concentrations of CO, C<sub>3</sub>H<sub>8</sub>, CO<sub>2</sub> and O<sub>2</sub> in the effluent gas were analyzed by an on-line gas chromatograph (PANNA A60, 5A column + Porapak Q column) using Ar as the carrier gas.

The CO conversion (or C<sub>3</sub>H<sub>8</sub> conversion) was calculated using the following equation:

$$X_{[C]} = \frac{[C]_{in} - [C]_{out}}{[C]_{in}} \times 100\%$$

where C represents the CO or C<sub>3</sub>H<sub>8</sub>, X<sub>[C]</sub> represents the CO/C<sub>3</sub>H<sub>8</sub> conversion. [C]<sub>in</sub>, [C]<sub>out</sub> are the concentrations of CO/C<sub>3</sub>H<sub>8</sub> at the inlet and outlet of the reactor, respectively.

Kinetic studies were conducted at low CO/C<sub>3</sub>H<sub>8</sub> conversion levels (through adjusting the WHSV and/or feed gas composition to restrict the CO/propane conversion in a range between 4% and 15%.) to ensure differential reaction mode. (1) *apparent activation energy*: The apparent activation energy (E<sub>a</sub>) of catalyst was obtained by studying the catalytic activity at different reaction temperatures (CO oxidation: (Pt/BFA-8O: 120 °C - 135 °C; Pt/BFA-8H: 30 °C - 45 °C) and Pt/BFA-8HO: 70 °C - 85 °C; C<sub>3</sub>H<sub>8</sub> oxidation: Pt/BFA-8H: 190 - 265 °C; Pt/BFA-8O and Pt/BFA-8HO: 100 °C - 175 °C). (a) CO oxidation: 50 mg of catalyst diluted by 500 mg of quartz was loaded in reactor and CO mixture gas (1 vol% CO+1 vol% O<sub>2</sub> +98 vol% Ar) was flowed (16.67 mL min<sup>-1</sup>) with a mass space velocity of 20,000 mL g<sup>-1</sup> h<sup>-1</sup>. (b) C<sub>3</sub>H<sub>8</sub> oxidation: 50 mg of catalyst diluted by 500 mg of quartz was loaded in reactor and C<sub>3</sub>H<sub>8</sub> mixture gas (0.2 vol% C<sub>3</sub>H<sub>8</sub>+2 vol% O<sub>2</sub> +97.8 vol% Ar) was flowed (33.34 mL min<sup>-1</sup>) with a mass space velocity of 40,000 mL g<sup>-1</sup> h<sup>-1</sup>. Before measurement, catalysts except the reduced ones were pre-reduced with H<sub>2</sub> at 400 °C for 1h. (2) *reaction orders*: (a) CO oxidation reaction: in typical, 50 mg of catalyst diluted by 500 mg of quartz was loaded in the reactor and CO mixture gas was flowed (16.67 mL min<sup>-1</sup>) with a mass space velocity of 20,000 mL g<sup>-1</sup> h<sup>-1</sup> at 40 °C. The partial pressures of CO were controlled in the range of 0.5 - 2 kPa while those of O<sub>2</sub>

were controlled in the range of 0.5 - 2 kPa. (b) C<sub>3</sub>H<sub>8</sub> reaction: 50 mg of catalyst diluted by 500 mg of quartz was loaded in the reactor and C<sub>3</sub>H<sub>8</sub> mixture gas was flowed (33.34 mL min<sup>-1</sup>) with a mass space velocity of 40,000 mL g<sup>-1</sup> h<sup>-1</sup> at 220 °C. The partial pressures of propane were controlled in the range of 0.16 - 0.22 kPa while those of oxygen were controlled in the range of 2.0 - 2.6kPa.

## 2. Catalyst characterization.

X-ray diffraction (XRD) patterns were measured on a Philips X' Pert PRO MPD diffractometer equipped with a Cu K $\alpha$  radiation source ( $\lambda = 0.15406$  nm), operating at 40 kV and 40 mA. A continuous mode was used for collecting data in the  $2\theta$  range from 10° to 80° at a rate of 12° min<sup>-1</sup> and step size of 0.0334°.

The Pt loading over catalysts was determined by the inductively coupled plasma optical emission spectrometer (ICP-OES) on Agilent 5110.

Brunauer-Emmett-Teller (BET) surface areas of the catalysts were measured by nitrogen adsorption at -196 °C using a Micromeritics ASAP 2460 apparatus. The samples were outgassed to 0.1 Pa at 300 °C at least 3 h.

High-angle annular dark-field (HAADF) scanning transmission electron microscopy (STEM) and high-resolution transmission electron microscopy (HRTEM) Images were performed on JEOL JEF-F200 to acquire the morphologies and particle size distributions of catalysts. The powder of Pt catalyst was suspended in ethanol with an ultrasonic dispersion for 10 min and then a drop of the resulting solution was dropped on a holey carbon film supported by a copper TEM grid.

X-ray photoelectron spectra (XPS) were obtained with a Thermo Scientific K-Alpha equipment with Al K $\alpha$  X-ray radiation ( $h\nu = 1486.6$  eV). The Pt(4d), Fe(2p) and O(1s) binding energy was calibrated with the value of contaminated carbon (C1s peak at 284.8 eV).

The <sup>57</sup>Fe Mössbauer spectra were recorded at room temperature with a spectrometer working in constant

acceleration mode with the  $^{57}\text{Co}$   $\gamma$ -quantum source in a Rh matrix. The powder samples used approximately  $10 \text{ mg cm}^{-2}$  of natural iron. All spectra were fitted by the MossWinn package, and the isomer shifts (IS) were given relative to the centroid of  $\alpha$ -Fe at room temperature.

Temperature-programmed reduction of  $\text{H}_2$  ( $\text{H}_2$ -TPR) was conducted on a Micromeritics Autochem 2720 instrument with a thermal conductivity detector (TCD). 100 mg of the samples were pretreated in Ar ( $30 \text{ mL min}^{-1}$ ) at  $120 \text{ }^\circ\text{C}$  for 1 h and then cooled to room temperature. Subsequently, the sample was heated to  $950 \text{ }^\circ\text{C}$  with a heating rate of  $10 \text{ }^\circ\text{C min}^{-1}$  under 10 vol%  $\text{H}_2/\text{Ar}$  ( $30 \text{ mL min}^{-1}$ ).

CO chemisorption was performed on Micromeritics Autochem 2920 instrument with a thermal conductivity detector (TCD). In a typical run for CO chemisorption, 100 mg of the catalyst was pre-reduced at  $400 \text{ }^\circ\text{C}$  in 10 vol%  $\text{H}_2 + 90 \text{ vol}\% \text{ N}_2$  ( $30 \text{ mL min}^{-1}$ ) for 1h, and then it was purged with pure He ( $30 \text{ mL min}^{-1}$ ) for another 1h. After the sample was cooled to  $30 \text{ }^\circ\text{C}$  in pure He, 5 vol% CO + 95 vol% He pulses were introduced. The Pt dispersion and the number of Pt monometallic sites were calculated on the basis of Pt/CO atomic ratio with 1:1 stoichiometry.<sup>2-4</sup> The number of Pt-BFA interfacial sites was calculated via the following equation: Quantity of the surface Pt-BFA interfacial sites = The number of total surfacial Pt sites – the number of metallic Pt sites (determined by actual CO uptake in CO chemisorption).<sup>3, 5</sup> The number of total surfacial Pt sites was estimated based on assumption of a spheroidal nanoparticle of platinum. The radius of Pt particles was obtained from HAADF-STEM analysis. Firstly, we estimated the number of Pt atoms in one Pt nanoparticles, which equal to total volume of Pt particle divide by volume of single Pt atom ( $N_1$ ); Secondly, we calculated the number of atoms below the surface layer of the sphere ( $N_2$ ), the radius of which equal to the nanoparticle radius minus one diameter of the Pt atom ( $0.278 \text{ nm}$ ). Third, the number of surfacial Pt sites in one Pt particle =  $N_1 - N_2$ . Fourth, the number of total number of Pt sites=  $(N_1 - N_2) \times \frac{\text{mass of Pt in 1 g of sample}}{\text{mass of Pt in one Pt particle}}$ .

In situ diffuse reflectance infrared Fourier transform spectroscopy (in situ DRIFTS) characterization was carried out on a Thermo Scientific Nicolet IS50, equipped with a MCT detector, and operated at a resolution of  $4\text{ cm}^{-1}$ . (1) *CO adsorption DRIFTS*: (i) For Pt/BFA-xH ( $x = 4, 5, 6, 7, 8$ ) and Pt/BFA-8H 4h samples, the samples were cooled to the  $20\text{ }^{\circ}\text{C}$  under Ar atmosphere after reduction. (ii) For Pt/BFA-8HO, Pt/BFA-8O and Pt/BFA-8H, the samples except Pt/BFA-8H were reduced at  $400\text{ }^{\circ}\text{C}$  for 0.5h under  $\text{H}_2$  atmosphere. Then the gas changed from  $\text{H}_2$  to Ar and the temperature was cooled to  $20\text{ }^{\circ}\text{C}$ . The background spectrum was then recorded, followed by introducing 1 vol% CO/Ar ( $15\text{ mL min}^{-1}$ ). After that, the temperature was raised to 40, 60, 80 and  $100\text{ }^{\circ}\text{C}$ . The data was collected with time on stream. (2) In situ DRIFTS under sequential CO  $\rightarrow$   $\text{O}_2 \rightarrow$  CO+ $\text{O}_2$  atmospheres: The samples except Pt/BFA-8H were reduced at  $400\text{ }^{\circ}\text{C}$  for 0.5h under  $\text{H}_2$  atmosphere. Then the gas changed from  $\text{H}_2$  to Ar and the temperature was cooled to  $50\text{ }^{\circ}\text{C}$ . The background spectrum was then recorded. 1 vol% CO/Ar was first passed through the chamber for 15 min, followed by purging with Ar for another 15 min. Then 1 vol%  $\text{O}_2$ /Ar was introduced for 15 min and then the gas composition was changed to 1 vol% CO +1 vol%  $\text{O}_2$  balanced with Ar for 15 min. The data was collected with time on stream. (3) *C<sub>3</sub>H<sub>8</sub> adsorption DRIFTS*: the samples except Pt/BFA-8H was pre-reduced at  $400\text{ }^{\circ}\text{C}$  for 1h and then cooled to  $30\text{ }^{\circ}\text{C}$  in Ar atmosphere. After the recording of back ground spectrum, 0.2 vol%  $\text{C}_3\text{H}_8$  (balanced with Ar) was introduced. All DRIFTS spectra were obtained under steady-state conditions. (4) In situ DRIFTS under sequential  $\text{C}_3\text{H}_8 \rightarrow \text{O}_2 \rightarrow \text{C}_3\text{H}_8+\text{O}_2$  atmospheres: The samples except Pt/BFA-8H were reduced at  $400\text{ }^{\circ}\text{C}$  for 0.5h under  $\text{H}_2$  atmosphere. Then the gas changed from  $\text{H}_2$  to Ar and the temperature was cooled to  $250\text{ }^{\circ}\text{C}$ . The background spectrum was then recorded. 0.2 vol%  $\text{C}_3\text{H}_8$ /Ar was first passed through the chamber for 15 min, followed by purging with Ar for another 15 min. Then 2 vol%  $\text{O}_2$ /Ar was introduced for 15 min and then the gas composition was changed to 0.2 vol%  $\text{C}_3\text{H}_8 + 2\text{ vol-\% } -\text{O}_2 + 97.8\text{ vol-\% Ar}$  for 15 min. The data was collected with time on stream.

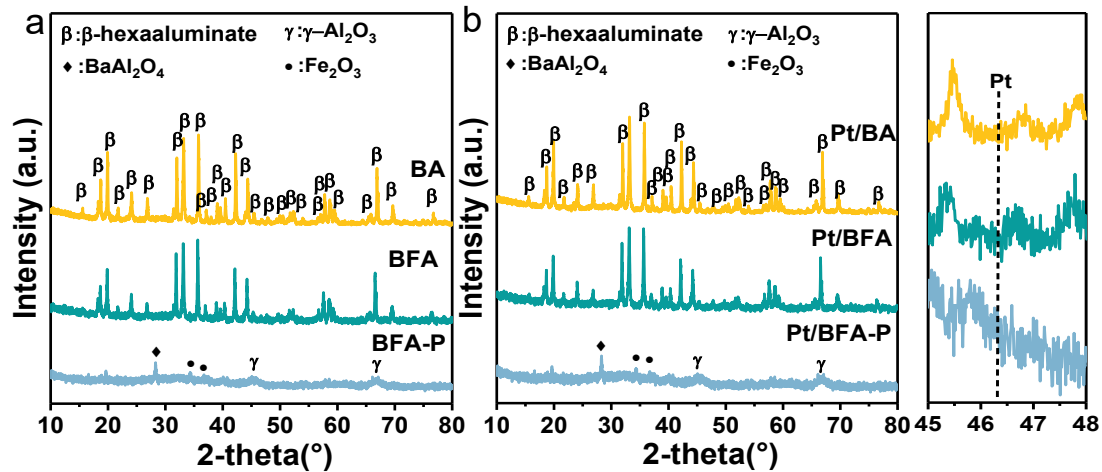

Fig. S1 XRD patterns over (a) supports and (b) catalysts.

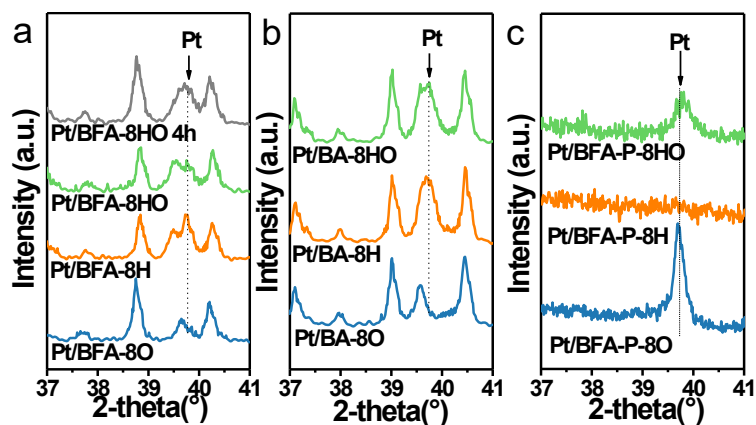

Fig. S2 XRD patterns from 37° to 41° for (a) Pt/BFA, (b) Pt/BA and (c) Pt/BFA-P calcined under different atmospheres.

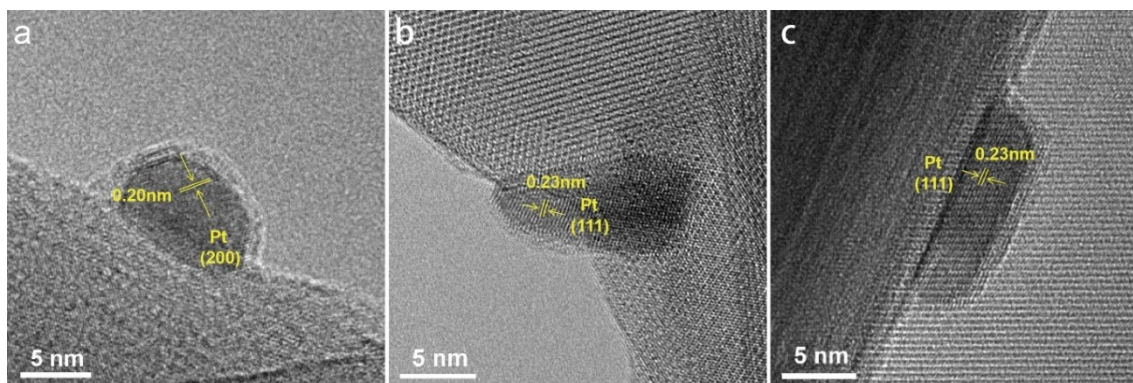

Fig. S3 HRTEM images of Pt/BFA-8H.

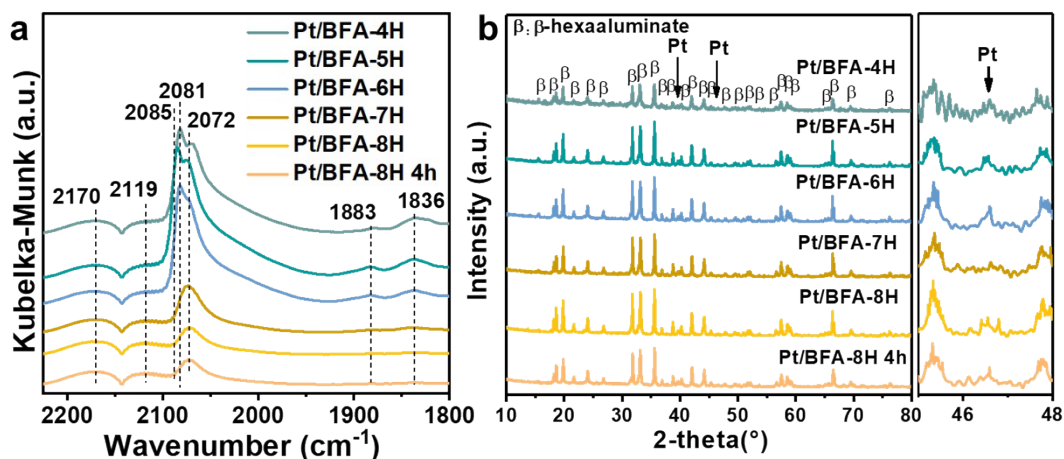

**Fig. S4** (a) CO DRIFTS of Pt/BFA reduced at various temperatures and time; (b) XRD patterns and its enlargement for Pt/BFA reduced at different temperatures.

The SMSI phenomenon on Pt/BFA was further studied via in situ CO adsorption DRIFTS (Fig. S4a). The peak at  $2072\text{ cm}^{-1}$  and  $2081\text{--}2085\text{ cm}^{-1}$  is attributed to the linear adsorption of CO on  $\text{Pt}^0$  sites and partially oxidized Pt species ( $\text{Pt}^{\delta+}$ ), respectively.<sup>6, 7</sup> In addition, peaks at around  $1883\text{ cm}^{-1}$  and  $1836\text{ cm}^{-1}$  can be assigned to CO bridge-bonded to platinum particles.<sup>6-8</sup> As shown, CO linear-bonded peaks were strong and kept nearly unchanged at reduction temperatures of  $400\text{--}600\text{ }^{\circ}\text{C}$ . When the reduction temperature was higher than  $700\text{ }^{\circ}\text{C}$ , intensities of all adsorbed CO peaks rapidly decreased and the peaks at  $2081\text{--}2085\text{ cm}^{-1}$ ,  $1883\text{ cm}^{-1}$  and  $1836\text{ cm}^{-1}$  were nearly absent. These facts suggest the cover of BFA support on Pt particles.<sup>2, 7, 9-12</sup> Furthermore, combined with the indistinctive change on intensities of XRD peaks assigned to Pt crystal phase for samples calcined under different temperatures (Fig. S4b), the encapsulation of Pt metal by BFA support overlayers is confirmed. The CO adsorption peaks do not disappear with further increasing the reduction temperatures or prolonging the calcination time. This could be due to the amorphous structure of coating layer observed from Fig. 2b and S3, which enables the permeation of molecules such as CO to active Pt sites.<sup>13</sup>



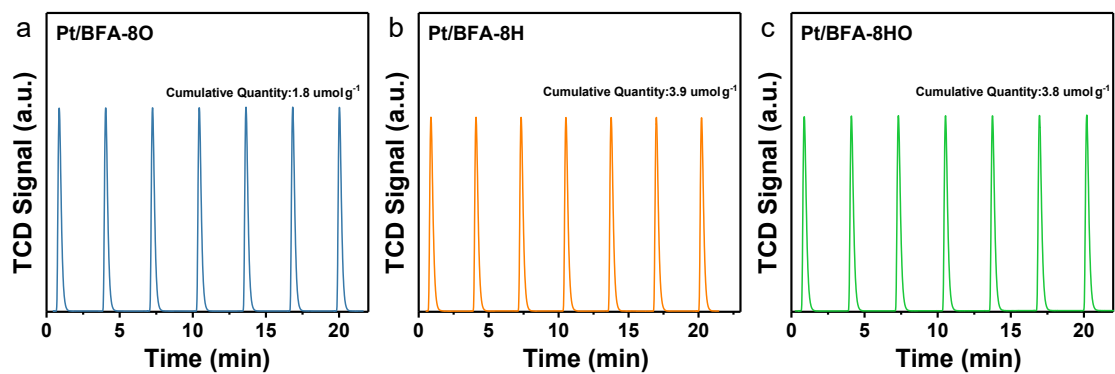

Fig. S5 The CO chemisorption spectrum at 30 °C over (a) Pt/BFA-8O, (b) Pt/BFA-8H and (c) Pt/BFA-8HO.

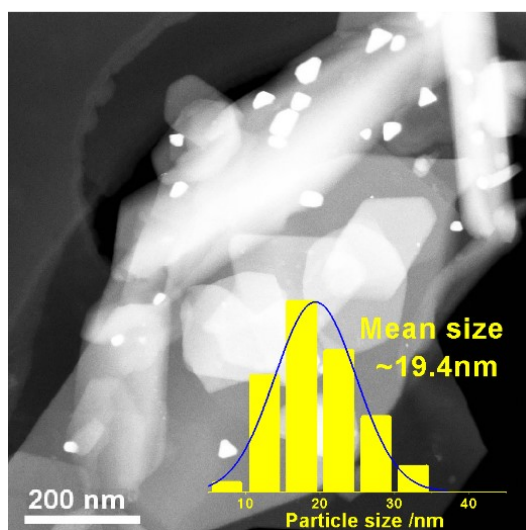

Fig. S6 HAADF-STEM images (the inset shows particle size distribution) of Pt/BFA-8HO 4h.

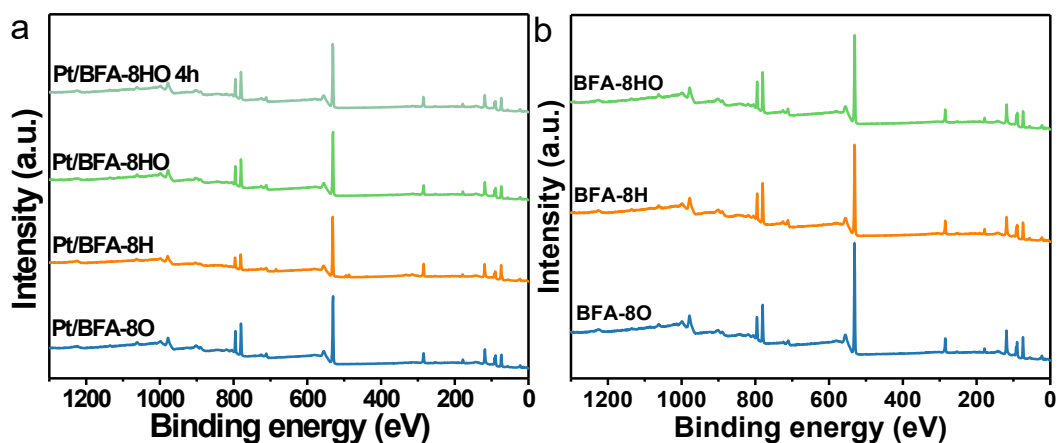

Fig. S7 The full spectra of XPS over (a) Pt/BFA and (b) BFA treated under different conditions.

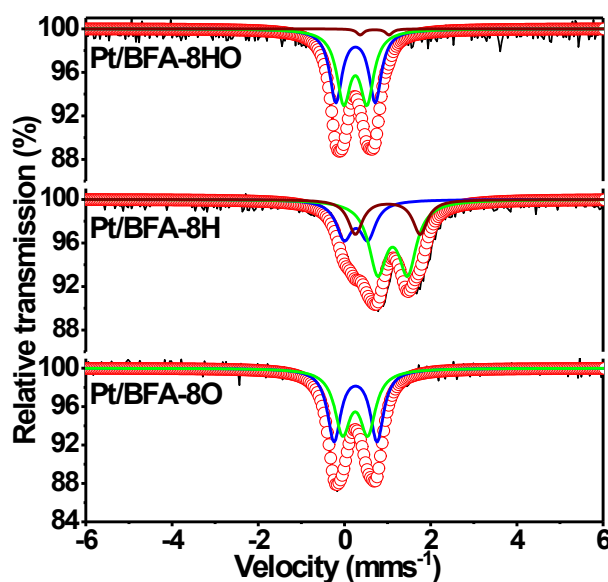

Fig. S8 <sup>57</sup>Fe Mössbauer spectra of Pt/BFA treated under different atmospheres at 800 °C.

As shown in Fig. S8 and Table S3, the reductive treatment resulted in the generation of Fe<sup>2+</sup> for Pt/BFA-8H in comparison to BFA support with framework Fe<sup>3+</sup> in Al(2) and Al(5) sites reported in our previous work.<sup>14</sup> The following oxidative calcination led to the full oxidation of reduced Fe cations over Pt/BFA-8HO and Pt/BFA-8HO 4h, the occupancies of Fe<sup>3+</sup> ions in which were similar to Pt/BFA-8O and BFA.

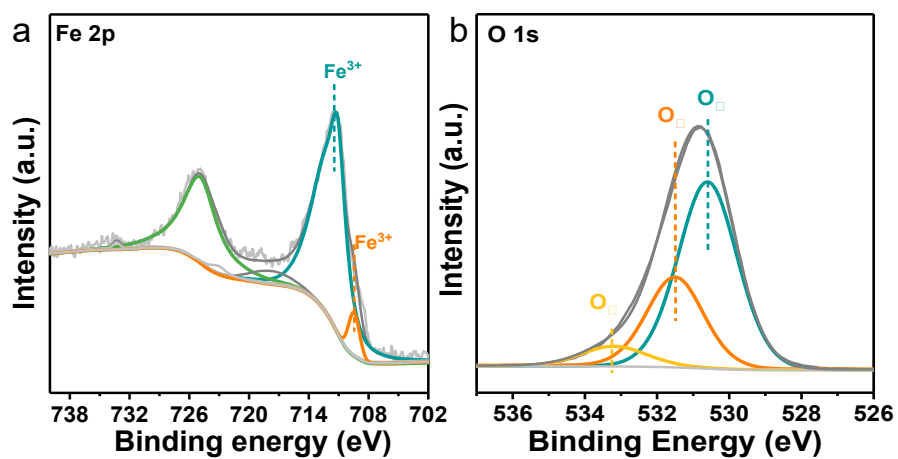

Fig. S9 (a) Fe 2p and (b) O 1s XPS spectra over Pt/BFA-8HO 4h catalyst.

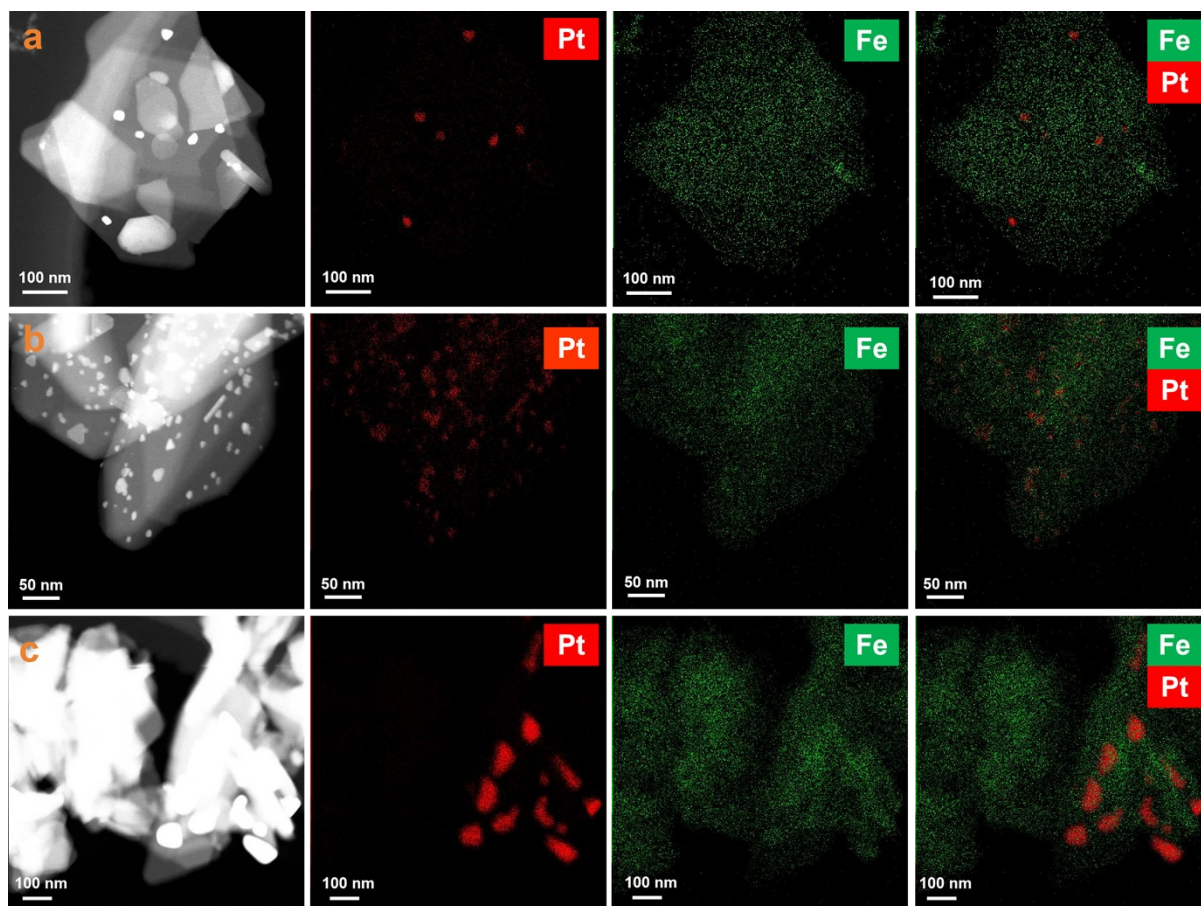

Fig. S10 HAADF-STEM images and corresponding EDS elemental mapping of (a) Pt/BFA-8HO, (b) Pt/BFA-8H and (c) Pt/BFA-8O.

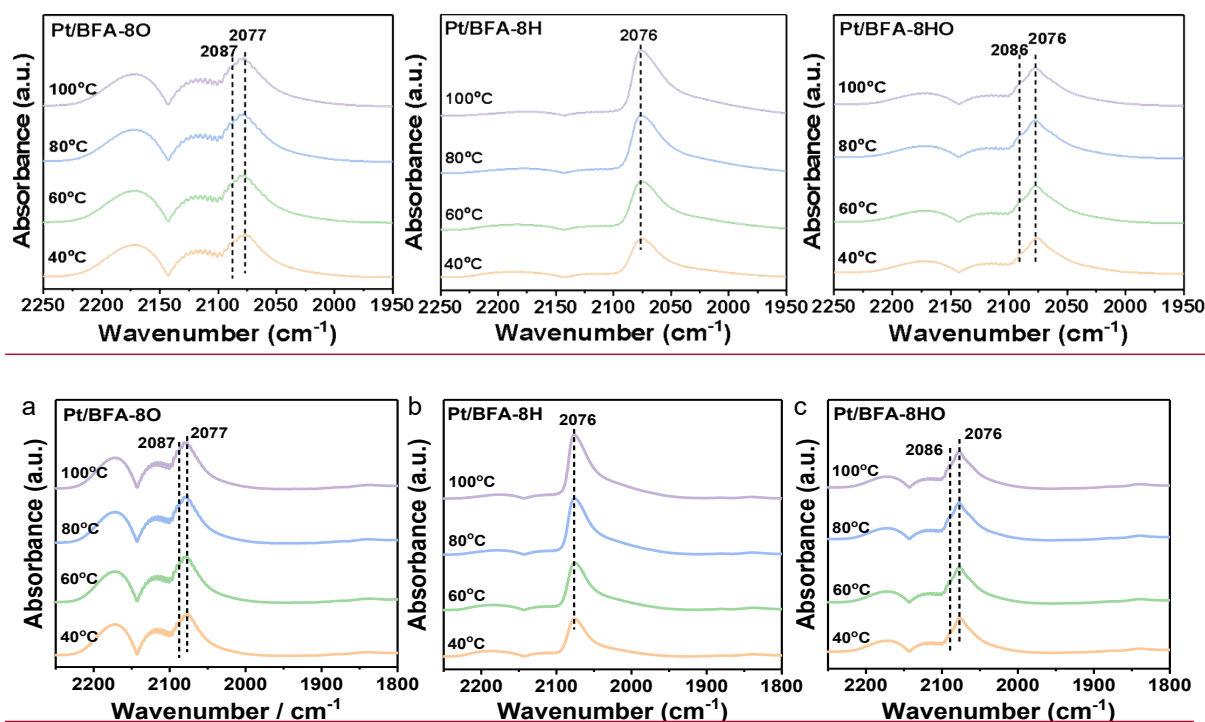

**Fig. S11** Temperature-dependent CO adsorption DRIFTS measurement on Pt/BFA-8O, Pt/BFA-8H and Pt/BFA-8HO. Before measurement, the Pt/BFA-8O and Pt/BFA-8HO catalysts were pre-reduced at 400 °C for 0.5 h.

As displayed, strong vibration peak around 2076  $\text{cm}^{-1}$  and relatively weak band at around 2086  $\text{cm}^{-1}$  is attributed to the linear adsorption of CO on  $\text{Pt}^0$  sites and partially oxidized Pt species ( $\text{Pt}^{\delta+}$ ), respectively.<sup>6,7</sup> As reported, the  $\text{Pt}^{\delta+}$  species over Pt/BFA-8HO and Pt/BFA-8O would probably be associated with the Pt-hexaaluminate interface.<sup>7</sup> Whereas, the band at 2086  $\text{cm}^{-1}$  was absent for Pt/BFA-8H, which would be ascribed to the encapsulation of BFA support on Pt nanoparticles.<sup>12</sup>

When the temperature increased from 40 to 100 °C, there was no red-shift of vibration frequency for all samples, suggesting that the dipole-dipole coupling effect can be excluded and the signal of adsorbed CO on  $\text{Pt}^0$  could effectively reflect the chemical state of Pt metal.<sup>15-17</sup> Therefore, the similar peak position at 40 °C suggests the analogous oxidation state of Pt particles among Pt/BFA-8O, Pt/BFA-8H and Pt/BFA-8HO samples.

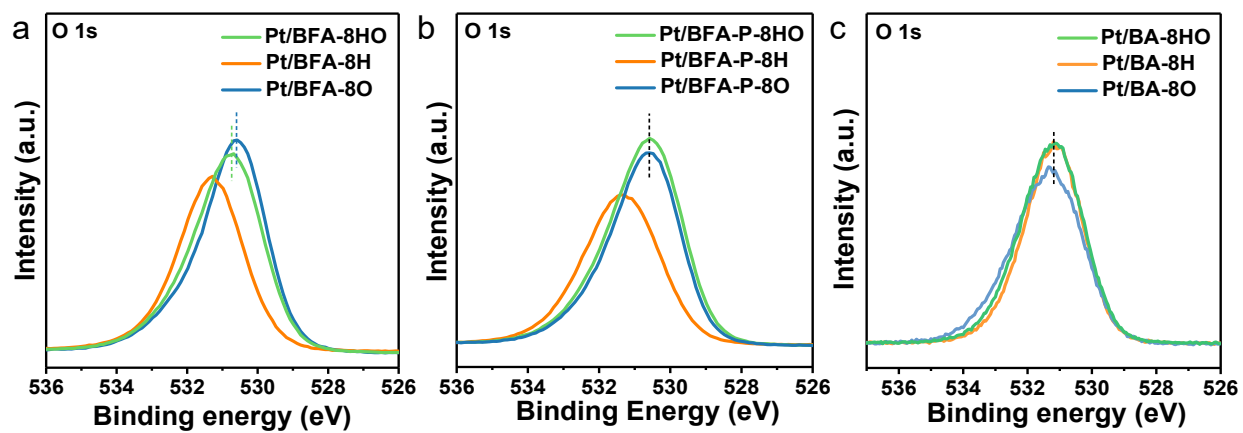

Fig. S12 O 1s XPS spectra over Pt/BFA, Pt/BFA-P and Pt/BA treated under different atmosphere.

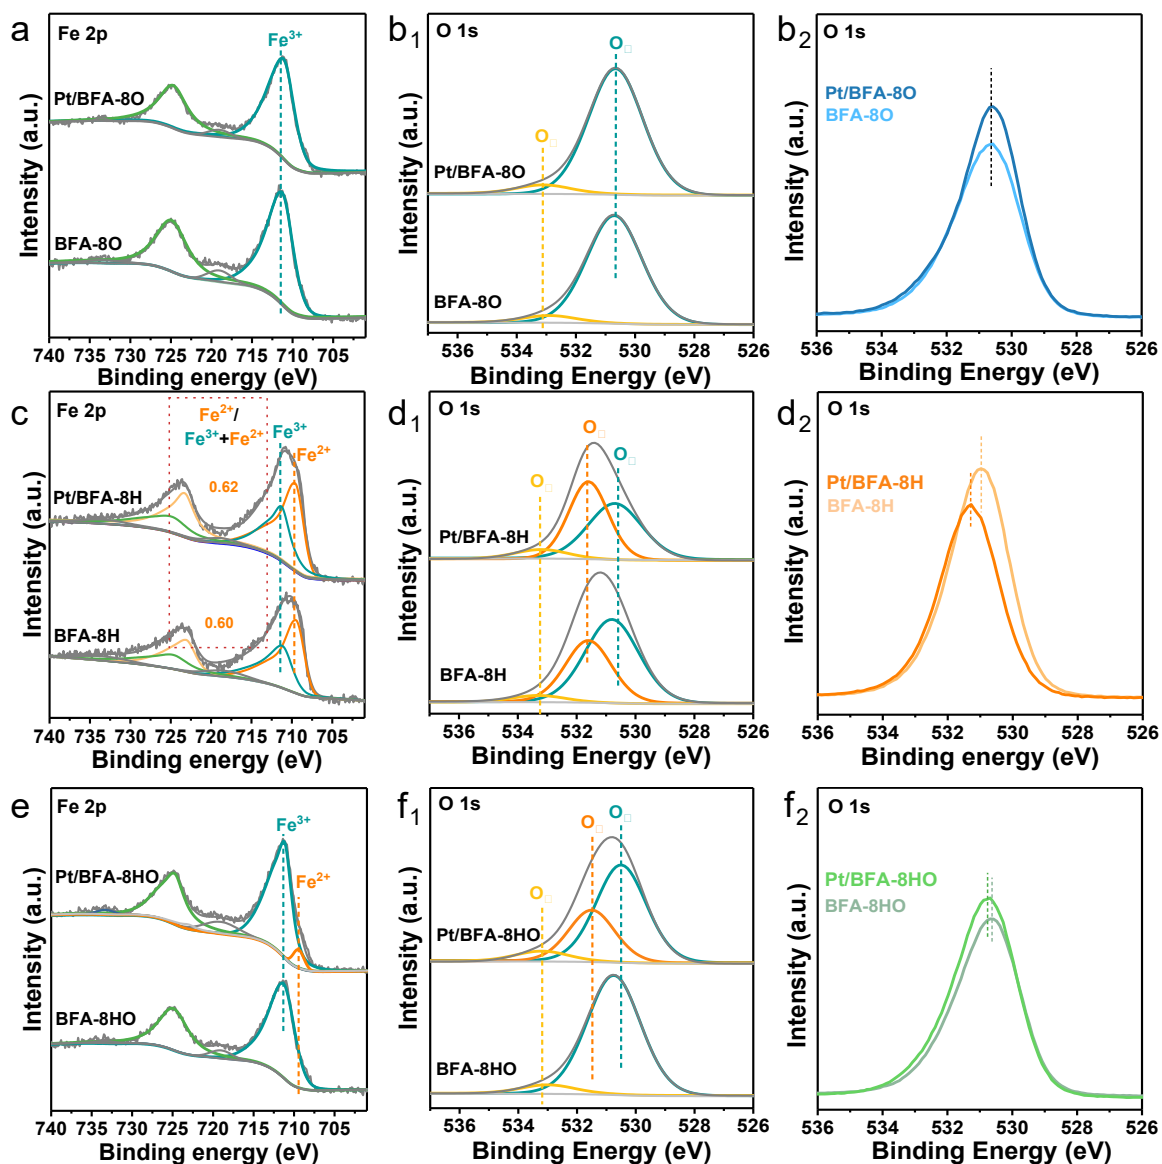

Fig. S13 XPS spectra of (a, c, e) Fe 2p and (b, d, f) O 1s for BFA and Pt/BFA treated under different atmospheres at 800 °C.

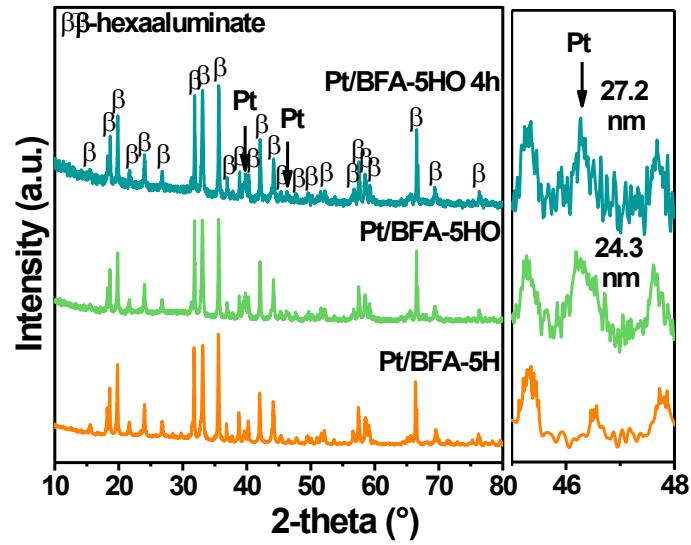

Fig. S14 XRD patterns and its enlargement for Pt/BFA reduced at 500 °C and followed by oxidative calcination at 800 °C.

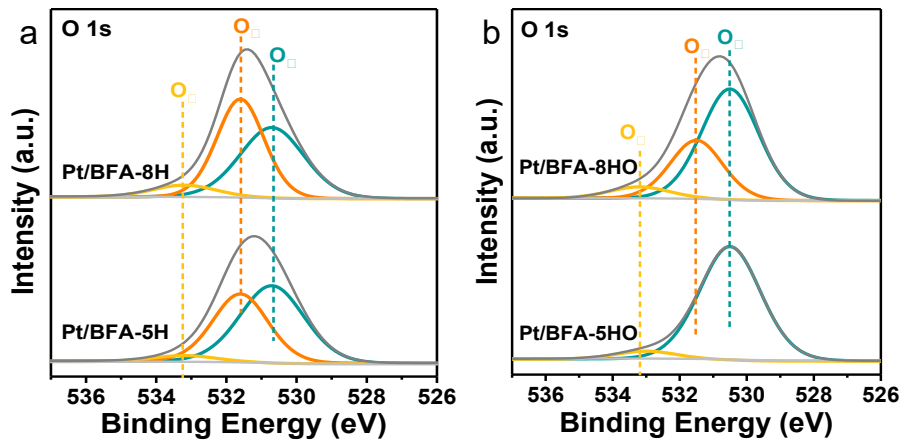

Fig. S15 O 1s XPS spectra for (a) Pt/BFA-xH and (b) Pt/BFA-xHO treated under different atmospheres at 800 °C (x=5;8).

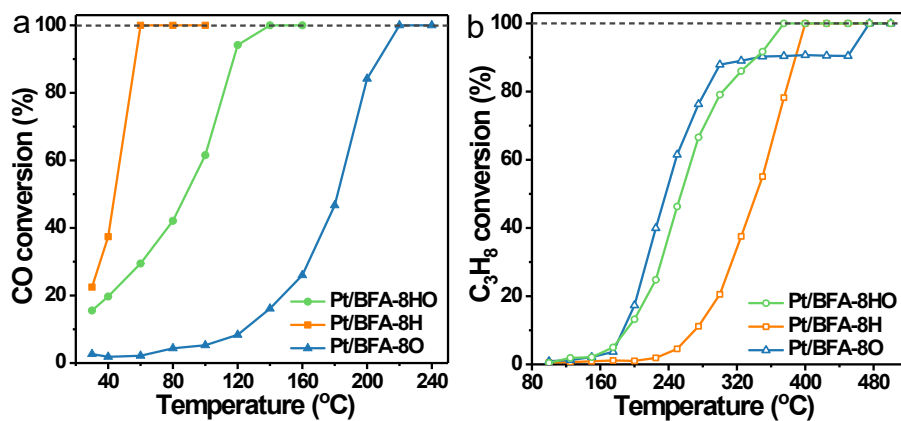

Fig. S16 (a) CO conversion and (b) C<sub>3</sub>H<sub>8</sub> conversion as a function of temperature over different catalysts.

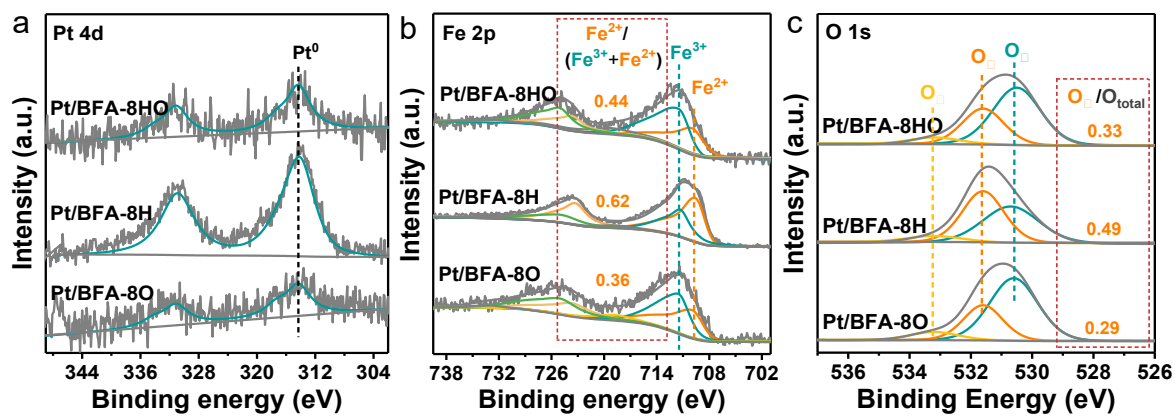

Fig. S17 XPS spectra of (a) Pt 4d, (b) Fe 2p and (c) O 1s for Pt/BFA -8HO, Pt/BFA-8O reduced at 400 °C for 1h and Pt/BFA-8H.



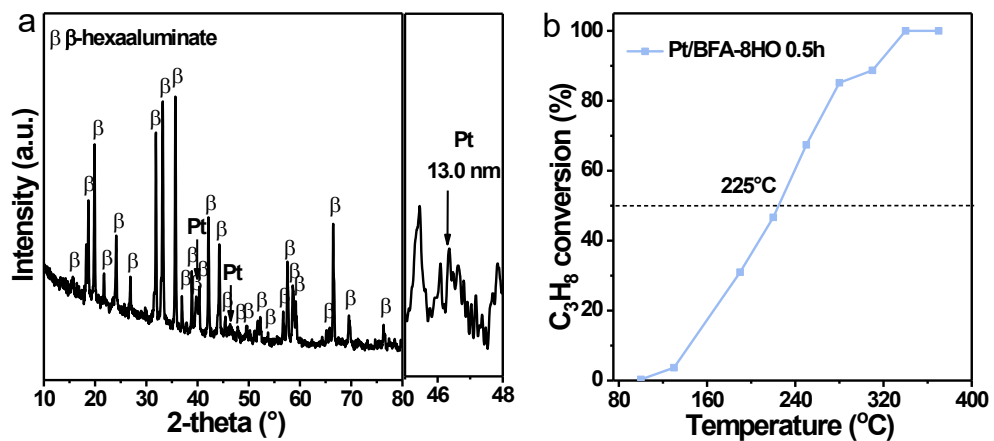

**Fig. S18** (a) XRD patterns and its enlargement for Pt/BFA-8HO 0.5h; (b) C<sub>3</sub>H<sub>8</sub> conversion as a function of temperature over Pt/BFA-8HO 0.5h. Reaction conditions: 0.2 vol % C<sub>3</sub>H<sub>8</sub> + 2 vol % O<sub>2</sub> + 97.8 vol % Ar. Before the test, the sample was reduced at 400 °C for 1h.

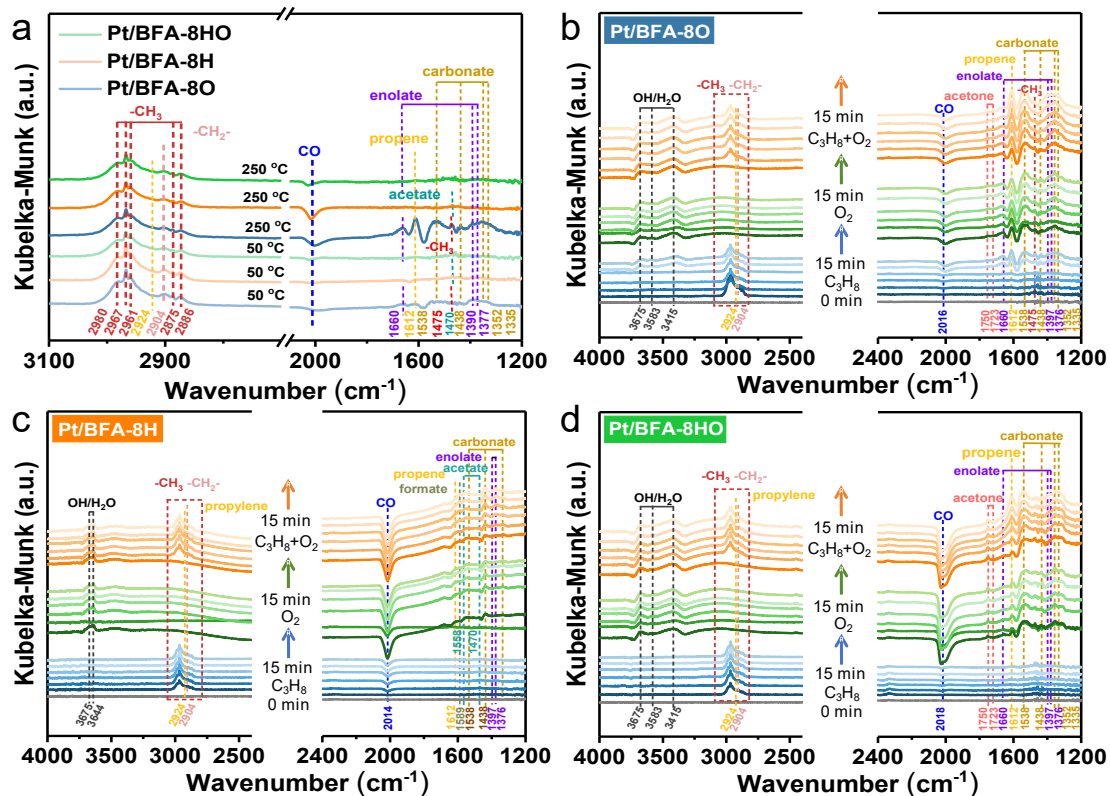

**Fig. S19** In situ DRIFT spectra over Pt/BFA-8O, Pt/BFA-8H, and Pt/BFA-8HO catalysts under conditions of (a)  $C_3H_8$  adsorption (0.2 vol%  $C_3H_8$  + 99.8 vol% Ar) at 30 °C and 250 °C. In-situ DRIFT spectra of  $C_3H_8$  oxidation over (b) Pt/BFA-8O, (c) Pt/BFA-8H and (d) Pt/BFA-8HO catalysts at 250 °C. Note: The catalyst was first exposed to 0.2 vol%  $C_3H_8$  for 15 min until the  $C_3H_8$  adsorption was saturated. After purging by Ar for 15 min, 2 vol%  $O_2$  and 0.2 vol%  $C_3H_8$  + 2 vol%  $O_2$  was introduced and the DRIFTS spectra were recorded.

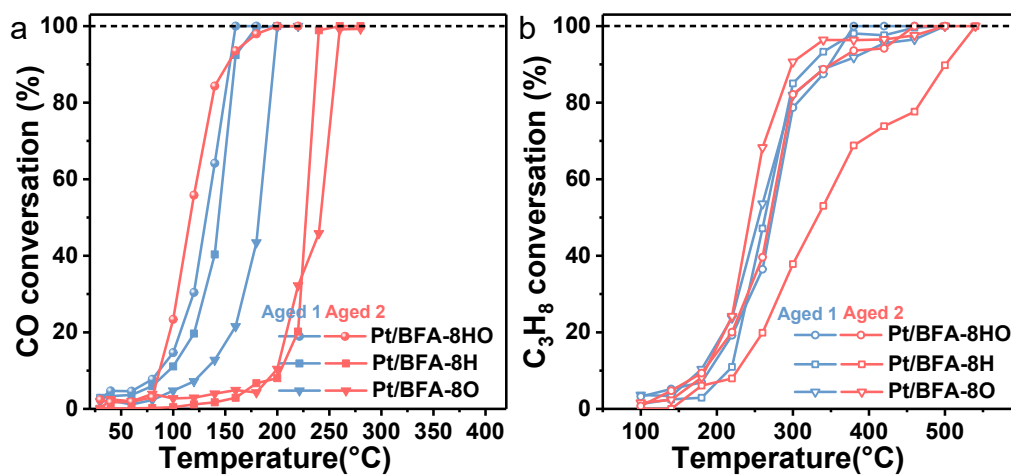

**Fig. S20** The (a) CO conversion and (b) C<sub>3</sub>H<sub>8</sub> conversion as a function of temperature over Pt/BFA-8H, Pt/BFA-8HO and Pt/BFA-8O catalysts after hydrothermal aging.

**Table S1.** Characteristic and reaction results of samples treated under different conditions.

| Catalysts    | $d_{Pt1}^{[a]}$ (nm) | $d_{Pt2}^{[b]}$ | Surface area<br>( $m^2 g^{-1}$ ) | Cumulative                       | Pt-BFA                              | $Fe^{2+}/$<br>( $Fe^{2+}+Fe^{3+}$ ) <sup>[d]</sup> | $O_{II}/$<br>$O_{total}$ | CO                        | $C_3H_8$                  |
|--------------|----------------------|-----------------|----------------------------------|----------------------------------|-------------------------------------|----------------------------------------------------|--------------------------|---------------------------|---------------------------|
|              |                      | (nm)            |                                  | Quantity<br>of CO <sup>[b]</sup> | interfacial<br>sites <sup>[c]</sup> |                                                    |                          | oxidation                 | Oxidation                 |
|              |                      |                 |                                  | ( $\mu mol g^{-1}$ )             | ( $\mu mol g^{-1}$ )                |                                                    |                          | $T_{50}(^{\circ}C)^{[e]}$ | $T_{50}(^{\circ}C)^{[e]}$ |
| Pt/BFA-8O    | 25.9                 | 62.3            | 13.5                             | 1.8                              | 0                                   | -                                                  | -                        | 182                       | 234                       |
| Pt/BFA-8H    | -                    | 28.2            | 13.8                             | 3.9                              | 7.0                                 | 0.62                                               | 0.49                     | 44                        | 339                       |
| Pt/BFA-8HO   | 16.7                 | 29.0            | 14.2                             | 3.8                              | 1.7                                 | 0.05                                               | 0.23                     | 88                        | 254                       |
| Pt/BA-8O     | 24.2                 | -               | 13.5                             | -                                | -                                   | -                                                  | -                        | 231                       |                           |
| Pt/BA-8H     | -                    | -               | 13.5                             | -                                | -                                   | -                                                  | -                        | 146                       |                           |
| Pt/BA-8HO    | 22.7                 | -               | 12.9                             | -                                | -                                   | -                                                  | -                        | 266                       |                           |
| Pt/BFA-P-8O  | 35.6                 | -               | 113.6                            | -                                | -                                   | -                                                  | -                        | 173                       |                           |
| Pt/BFA-P-8H  | -                    | -               | 105.2                            | -                                | -                                   | -                                                  | 0.43                     | 108                       |                           |
| Pt/BFA-P-8HO | 21.2                 | -               | 92.6                             | -                                | -                                   | -                                                  | -                        | 169                       |                           |

|                 |      |   |   |   |   |      |      |    |   |     |
|-----------------|------|---|---|---|---|------|------|----|---|-----|
| Pt/BFA-8HO 0.5h | 13.0 | - | - | - | - | -    | -    | -  | - | 225 |
| Pt/BFA-8HO 4h   | 17.5 | - | - | - | - | 0.05 | 0.25 | 93 |   | 264 |
| Pt/BFA-5H       | -    | - | - | - | - | 0.53 | 0.37 | -  |   | -   |
| Pt/BFA-5HO      | 24.3 | - | - | - | - | -    | -    | -  |   | -   |
| Pt/BFA-5HO 4h   | 27.2 | - | - | - | - | -    | -    | -  |   | -   |

[a]. Estimated according to the Scherrer equation using the full width at half maximum (FWHM) of Pt (200) peak.

[b]. Calculated based on the CO chemisorption data (CO/Pt=1/1) at 30°C.

[c]. The number of Pt-BFA interfacial sites was calculated via the following equation: Quantity of the surface Pt-BFA interfacial sites = The number of total surfacial Pt sites – the number of metallic Pt sites (determined by actual CO uptake in CO chemisorption).

[d]. obtained from XPS results.

[e].  $T_{50}$  represents the temperature for 50% CO or  $C_3H_8$  conversion.

**Table S2.** XPS analysis of Fe 2p binding energy over BFA, Pt/BFA samples treated under different conditions.

| Catalysts     | Fe(eV)            |                   |                   |           |                   |                   |                   |           |
|---------------|-------------------|-------------------|-------------------|-----------|-------------------|-------------------|-------------------|-----------|
|               | Fe <sup>0</sup>   | Fe <sup>2+</sup>  | Fe <sup>3+</sup>  | Satellite | Fe <sup>0</sup>   | Fe <sup>2+</sup>  | Fe <sup>3+</sup>  | Satellite |
|               | 2p <sub>3/2</sub> | 2p <sub>3/2</sub> | 2p <sub>3/2</sub> |           | 2p <sub>1/2</sub> | 2p <sub>1/2</sub> | 2p <sub>1/2</sub> |           |
| Pt/BFA-8O     | -                 | -                 | 711.0             | 719.0     | -                 | -                 | 724.7             | 733.3     |
| Pt/BFA-8H     | -                 | 709.6             | 711.3             | 718.8     | -                 | 723.3             | 724.9             | 733.3     |
| Pt/BFA-8HO    | -                 | 709.5             | 711.2             | 719.0     | -                 | 723.1             | 724.8             | 733.3     |
| Pt/BFA-8HO 4h | -                 | 709.5             | 711.2             | 717.8     | -                 | 723.1             | 724.9             | 733.3     |
| Pt/BFA-P-8H   | 706.8             | 709.8             | 711.2             | 718.2     | 720.4             | 723.4             | 724.6             | 733.3     |
| Pt/BFA-P-8HO  | -                 | -                 | 711.0             | 719.3     | -                 | -                 | 724.3             | 733.3     |
| Pt/BFA-P-8O   | -                 | -                 | 711.0             | 720.0     | -                 | -                 | 724.6             | 733.0     |
| Pt/BFA-5H     | -                 | 709.9             | 711.3             | 719.0     | -                 | 723.6             | 724.9             | 733.3     |
| Pt/BFA-5HO    | -                 | -                 | 711.0             | 719.0     | -                 | -                 | 724.7             | 733.3     |
| BFA-8O        | -                 | -                 | 711.3             | 719.0     | -                 | -                 | 724.9             | 733.3     |
| BFA-8H        | -                 | 709.5             | 711.2             | 718.4     | -                 | 723.1             | 724.8             | 733.3     |
| BFA-8HO       | -                 | -                 | 711.3             | 719.0     | -                 | -                 | 724.9             | 733.3     |

**Table S3.**  $^{57}\text{Fe}$  Mössbauer parameters of Pt/BFA treated in different atmosphere.

| Catalysts          | IS <sup>[b]</sup><br>(mm s <sup>-1</sup> ) | QS <sup>[c]</sup><br>(mm s <sup>-1</sup> ) | H <sup>[d]</sup> (KOe) | A <sup>[e]</sup> | Blocks | Assignment                      |
|--------------------|--------------------------------------------|--------------------------------------------|------------------------|------------------|--------|---------------------------------|
| BFA <sup>[a]</sup> | 0.21                                       | 0.60                                       | -                      | 51               | Spinel | Fe <sup>3+</sup> in Al(2) sites |
|                    | 0.23                                       | 1.01                                       | -                      | 49               | Mirror | Fe <sup>3+</sup> in Al(5) sites |
| Pt/BFA-8O          | 0.25                                       | 0.59                                       | -                      | 50               | Spinel | Fe <sup>3+</sup> in Al(2) sites |
|                    | 0.26                                       | 1.00                                       | -                      | 50               | Mirror | Fe <sup>3+</sup> in Al(5) sites |
| Pt/BFA-8H          | 0.27                                       | 0.55                                       | -                      | 25               | Spinel | Fe <sup>3+</sup> in Al(2) sites |
|                    | 1.12                                       | 0.69                                       | -                      | 53               | -      | Fe <sup>2+</sup>                |
|                    | 1.01                                       | 1.50                                       | -                      | 22               | -      | Fe <sup>2+</sup>                |
| Pt/BFA-8HO         | 0.25                                       | 0.51                                       | -                      | 44               | Spinel | Fe <sup>3+</sup> in Al(2) sites |
|                    | 0.26                                       | 0.89                                       | --                     | 56               | Mirror | Fe <sup>3+</sup> in Al(5) sites |
| Pt/BFA-8HO 4h      | 0.25                                       | 0.55                                       | -                      | 44               | Spinel | Fe <sup>3+</sup> in Al(2) sites |
|                    | 0.26                                       | 0.90                                       | -                      | 56               | Mirror | Fe <sup>3+</sup> in Al(5) sites |

[a] According to our previous work [*J. Energy Chem.* 2019,29, 50–57].

[b] Isomer shift relative to  $\alpha$ -Fe.

[c] Quadrupole splitting.

[d] Magnetic field

[e] Relative area: uncertainty is  $\pm 5\%$  of reported value.

[f] Octahedral

[g] Tetrahedral

**Table S4.** XPS analysis of O 1s signals over BFA, Pt/BFA treated under different conditions.

| Catalysts     | O 1s(eV)       |                 |                  |
|---------------|----------------|-----------------|------------------|
|               | O <sub>I</sub> | O <sub>II</sub> | O <sub>III</sub> |
| Pt/BFA-8O     | 530.6          | -               | 533.2            |
| Pt/BFA-8H     | 530.6          | 531.6           | 533.2            |
| Pt/BFA-8HO    | 530.6          | 531.5           | 533.2            |
| Pt/BFA-8HO 4h | 530.6          | 531.6           | 533.2            |
| Pt/BA-8O      | 530.2          | -               | 533.1            |
| Pt/BA-8H      | 530.2          | -               | 533.1            |
| Pt/BA-8HO     | 530.2          | -               | 533.1            |
| Pt/BFA-P-8O   | 530.6          | -               | 533.2            |
| Pt/BFA-P-8H   | 530.6          | 531.6           | 533.2            |
| Pt/BFA-P-8HO  | 530.6          | -               | 533.2            |
| Pt/BFA-5H     | 530.6          | 531.6           | 533.2            |
| Pt/BFA-5HO    | 530.6          | -               | 533.2            |
| BFA-8O        | 530.6          | -               | 533.2            |
| BFA-8H        | 530.6          | 531.6           | 533.2            |
| BFA-8HO       | 530.6          | -               | 533.2            |



**Table S5.** H<sub>2</sub>-TPR results of samples.

| Catalysts | Peak temperature (°C) |     |
|-----------|-----------------------|-----|
| BFA       | -                     | 490 |
| Pt/BFA    | 144                   | 456 |
| BA        | -                     | -   |
| Pt/BA     | -                     | -   |

**Table S6.** Kinetic parameters of CO oxidation (T=40 °C) and C<sub>3</sub>H<sub>8</sub> oxidation (T=220 °C) over the Pt/BFA-8O, Pt/BFA-8H and Pt/BFA-8HO catalysts.

| Catalyst   | r=k[P <sub>CO</sub> ] <sup>a</sup> [P <sub>O2</sub> ] <sup>b</sup> (CO oxidation) |             |             |                             | r=k[P <sub>C3H8</sub> ] <sup>c</sup> [P <sub>O2</sub> ] <sup>d</sup> (C <sub>3</sub> H <sub>8</sub> oxidation) |             |              |                             |
|------------|-----------------------------------------------------------------------------------|-------------|-------------|-----------------------------|----------------------------------------------------------------------------------------------------------------|-------------|--------------|-----------------------------|
|            | k (×10 <sup>-5</sup> )                                                            | a           | b           | Ea(KJ • mol <sup>-1</sup> ) | k (×10 <sup>-5</sup> )                                                                                         | c           | d            | Ea(KJ • mol <sup>-1</sup> ) |
| Pt/BFA-8O  | 2.86                                                                              | 0.03 ± 0.01 | 0.98 ± 0.01 | 67.9 ± 2.1                  | 5.70                                                                                                           | 0.89 ± 0.02 | -0.12 ± 0.02 | 42.6 ± 3.2                  |
| Pt/BFA-8H  | 7.70                                                                              | 0.07 ± 0.02 | 1.01 ± 0.02 | 28.8 ± 3.3                  | 3.75                                                                                                           | 0.99 ± 0.02 | -0.10 ± 0.01 | 74.1 ± 1.4                  |
| Pt/BFA-8HO | 5.83                                                                              | 0.06 ± 0.01 | 0.99 ± 0.01 | 44.5 ± 1.8                  | 5.16                                                                                                           | 1.02 ± 0.01 | -0.09 ± 0.01 | 41.5 ± 2.5                  |

**Table S7.** Frequencies of functional groups present on the Pt/BFA-8H, Pt/BFA-8HO and Pt/BFA-8O catalysts analyzed by DRIFTS about propane adsorption and oxidation.

| Assignment       | Vibrational mode                        | Infrared band wavenumber (cm <sup>-1</sup> ) |            |            | Reference    |
|------------------|-----------------------------------------|----------------------------------------------|------------|------------|--------------|
|                  |                                         | Pt/BFA-8H                                    | Pt/BFA-8HO | Pt/BFA-8O  |              |
| H <sub>2</sub> O | -OH                                     | 3200-3800                                    | 3200-3800  | 3200-3800  | 18-20        |
| Propane          | -CH <sub>3</sub>                        | 2980, 2967, 2961, 2875, 2886                 |            |            | 3, 21        |
|                  | -CH <sub>2</sub> -                      | 2904                                         |            |            |              |
| CO               |                                         | 2014                                         | 2018       | 2016       | 7, 22        |
| Acetone          | v(C=O)                                  | -                                            | 1750, 1723 | 1750, 1723 | 21, 23       |
| Propylene        | δ(CH)                                   | 2924                                         |            |            | 21, 24       |
|                  | v(C=C)                                  | 1612                                         |            |            |              |
| Formate          | v <sub>as</sub> (COO)                   | 1589                                         | -          | -          | 25           |
| Methoxy          | δ <sub>as</sub> (CH <sub>3</sub> )      | -                                            | -          | 1475       | 25           |
| Acetate          | v <sub>as</sub> (COO)                   | 1558                                         | -          | -          | 21, 25       |
|                  | v <sub>s</sub> (COO)                    | 1470                                         | -          | -          |              |
| Enolate          | v <sub>as</sub> (CH <sub>2</sub> =CH-O) | -                                            | 1660       | 1660       | 23, 26       |
|                  | v <sub>s</sub> (CH <sub>2</sub> =CH-O)  | 1397                                         |            |            |              |
|                  | δ (CH)                                  | 1376                                         |            |            |              |
| Carbonate        | -                                       | 1538, 1438, 1352, 1335                       |            |            | 3, 7, 21, 27 |

## References:

1. B. Hong, J.-X. Liang, X. Sun, M. Tian, F. Huang, Y. Zheng, J. Lin, L. Li, Y. Zhou and X. Wang, *ACS Catal.*, 2021, **11**, 5709-5717.
2. I. Ro, I. B. Aragao, J. P. Chada, Y. Liu, K. R. Rivera-Dones, M. R. Ball, D. Zanchet, J. A. Dumesic and G. W. Huber, *J. Catal.*, 2018, **358**, 19-26.
3. P.-P. Zhao, J. Chen, H.-B. Yu, B.-H. Cen, W.-Y. Wang, M.-F. Luo and J.-Q. Lu, *J. Catal.*, 2020, **391**, 80-90.
4. I. Ro, C. Sener, T. M. Stadelman, M. R. Ball, J. M. Venegas, S. P. Burt, I. Hermans, J. A. Dumesic and G. W. Huber, *J. Catal.*, 2016, **344**, 784-794.
5. R. Carrasquillo-Flores, I. Ro, M. D. Kumbhalkar, S. Burt, C. A. Carrero, A. C. Alba-Rubio, J. T. Miller, I. Hermans, G. W. Huber and J. A. Dumesic, *J. Am. Chem. Soc.*, 2015, **137**, 10317-10325.
6. M. Di, K. Simmance, A. Schaefer, Y. Feng, F. Hemmingsson, M. Skoglundh, T. Bell, D. Thompsett, L. I. Ajakaiye Jensen, S. Blomberg and P.-A. Carlsson, *J. Catal.*, 2022, **409**, 1-11.
7. B. Li, X.-F. Wang, W.-Y. Wang, C.-F. Liu, L.-C. He, M.-F. Luo and J. Chen, *Appl. Catal., A*, 2023, **649**, 118960.
8. X. Liu, S. Jia, M. Yang, Y. Tang, Y. Wen, S. Chu, J. Wang, B. Shan and R. Chen, *Nat. Comm.*, 2020, **11**, 4240.
9. S. Lee, S. Kim, T. Kim, C. Lin, W.-J. Lee, S.-J. Kim, R. J. Gorte and W. Jung, *Catal. Commun.*, 2022, **172**, 106549.
10. K. Shen, S. Lee, O. Kwon, M. Fan, R. J. Gorte and J. M. Vohs, *ACS Catal.*, 2023, **13**, 11144-11152.
11. X. Mao, A. C. Foucher, T. Montini, E. A. Stach, P. Fornasiero and R. J. Gorte, *J. Am. Chem. Soc.*, 2020, **142**, 10373-10382.
12. L. Cao, W. Liu, Q. Luo, R. Yin, B. Wang, J. Weissenrieder, M. Soldemo, H. Yan, Y. Lin, Z. Sun, C. Ma, W. Zhang, S. Chen, H. Wang, Q. Guan, T. Yao, S. Wei, J. Yang and J. Lu, *Nature*, 2019, **565**, 631-635.
13. F. Huang, M. Tian, Y. Zhu, X. Wang, A. Wang, L. Li, J. Lin and J. Wang, *J. Energy Chem.*, 2019, **29**, 50-57.
14. K. Shen, J.-P. Lin, Q. Xia, L. Dai, G.-J. Zhou, Y.-L. Guo, G.-Z. Lu and W.-C. Zhan, *Rare Metals*, 2018, **38**, 107-114.
15. *Springer Handbook of Advanced Catalyst Characterization*, 2023.
16. T. Wang, J.-Y. Xing, A.-P. Jia, C. Tang, Y.-J. Wang, M.-F. Luo and J.-Q. Lu, *J. Catal.*, 2020, **382**, 192-203.
17. K. Ding, A. Gulec, A. M. Johnson, N. M. Schweitzer, G. D. Stucky, L. D. Marks and P. C. Stair, *Science*, 2015, **350**, 189-192.
18. K. Murata, J. Ohyama, Y. Yamamoto, S. Arai and A. Satsuma, *ACS Catal.*, 2020, **10**, 8149-8156.
19. Y. An, S.-Y. Chen, B. Wang, L. Zhou, G. Hao, Y. Wang, J. Chen, C.-K. Tsung, Z. Liu and L.-Y. Chou, *J. Mater. Chem. A*, 2023, **11**, 16838-16845.
20. J. Saavedra, H. A. Doan, C. J. Pursell, L. C. Grabow and B. D. Chandler, *Science*, 2014, **345**, 1599-1602.
21. F. He, C. Rao, S. Tao, L. Sun, T. Yi, H. Wang, B. Hu, X. Yang and Y. Zhang, *ACS Appl. Nano Mater.*, 2024, **7**, 11609-11620.
22. J. Liu, F. R. Lucci, M. Yang, S. Lee, M. D. Marcinkowski, A. J. Therrien, C. T. Williams, E. C. Sykes and M. Flytzani-Stephanopoulos, *J. Am. Chem. Soc.*, 2016, **138**, 6396-6399.
23. Y. You, A. Xu, Y. Lv, L. Yang, X. Tang, J. Tang, Y. Guo, Y. Cui, W. Zhan, L. Wang, Y. Guo and S. Dai, *Catal. Sci. Technol.*, 2024, **14**, 4058-4067.
24. Y. Shi, J. Li, Q. Wang, S. Yao, Z. Wu, E. Gao, W. Wang, J. Zhu, L. Li and N. Wu, *Sep. Purif. Technol.*, 2024, **328**, 125101.
25. C. P. O'Brien and I. C. Lee, *J. Catal.*, 2017, **347**, 1-8.
26. X.-F. Wang, L.-Y. Xu, C.-H. Wen, D.-D. Li, B. Li, J.-Q. Lu, Q.-H. Yang, M.-F. Luo and J. Chen, *Appl. Catal., B*, 2023, **338**, 123000.
27. C.-F. Liu, X.-F. Wang, C.-H. Wen, B. Li, C. Tang, J.-Q. Lu, M.-F. Luo and J. Chen, *Appl. Surf. Sci.*, 2023, **617**, 156572.
